# Supplementary material for: Highly H2O permeable ionic liquid encapsulated metal–organic framework membranes for energy-efficient air-dehumidification
Source: Royal Society of Chemistry journal article supplement (doi:10.1039/d0ta07780a), 2020-01-01
Supplement: d0ta07780a1.pdf [file d0ta07780a1.pdf]

## Supporting Information

### Highly H<sub>2</sub>O Permeable Ionic Liquid Encapsulated Metal-Organic Framework Membranes for Energy-efficient Air-Dehumidification

Sunghwan Park<sup>a</sup> and Hae-Kwon Jeong<sup>\*,a,b</sup>

<sup>a</sup> Artie McFerrin Department of Chemical Engineering and <sup>b</sup> Department of Materials Science  
and Engineering, Texas A&M University, 3122 TAMU, College Station, TX 77843-3122, United  
States

\* Corresponding author:

H.-K. Jeong (E-mail address: [hjeong7@tamu.edu](mailto:hjeong7@tamu.edu), Phone: +1-979-862-4850, Fax: +1-979-845-  
6446)

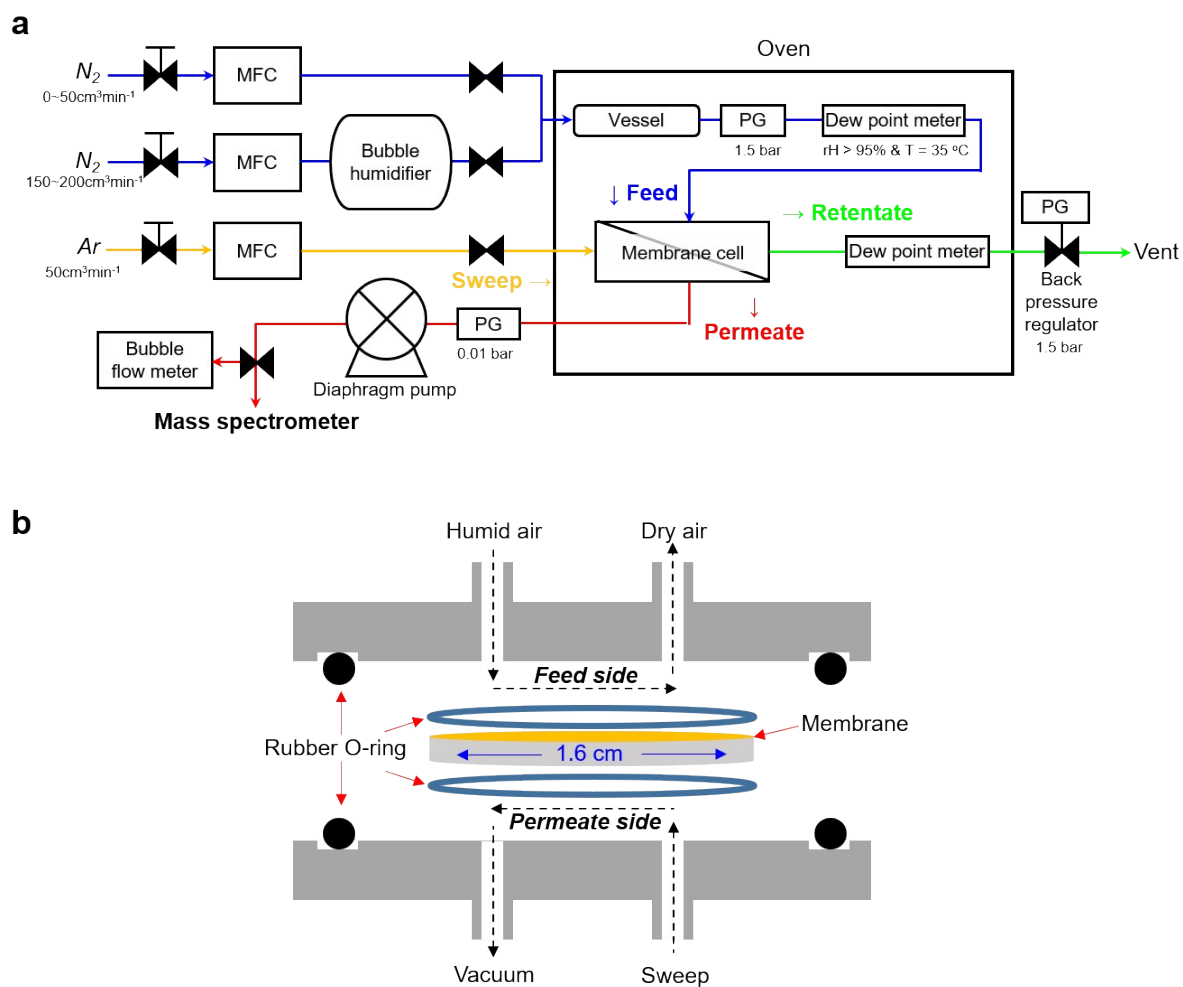

**Fig. S1.** (a) Schematic diagram of permeation measurement system and (b) design of the membrane test cell.

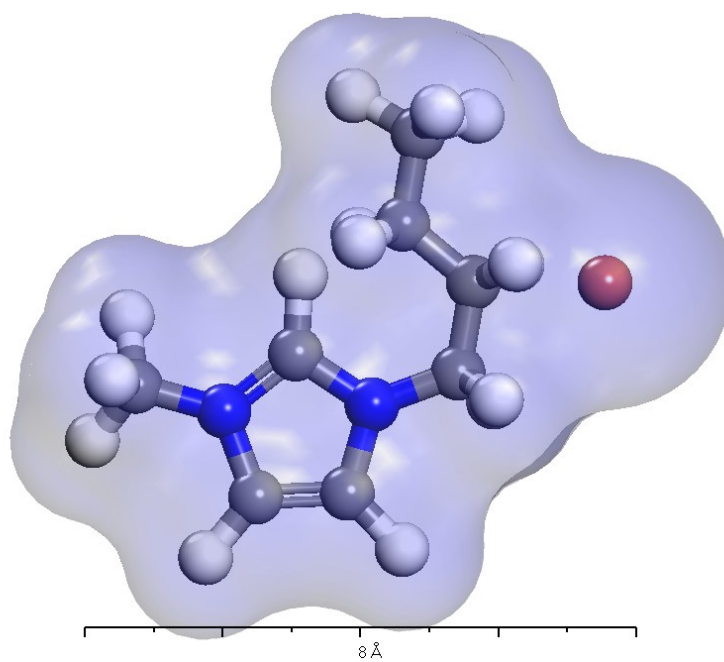

**Fig. S2.** Structure of [C<sub>4</sub>MIM][Br] with an isosurface created by using the Connolly surface method.

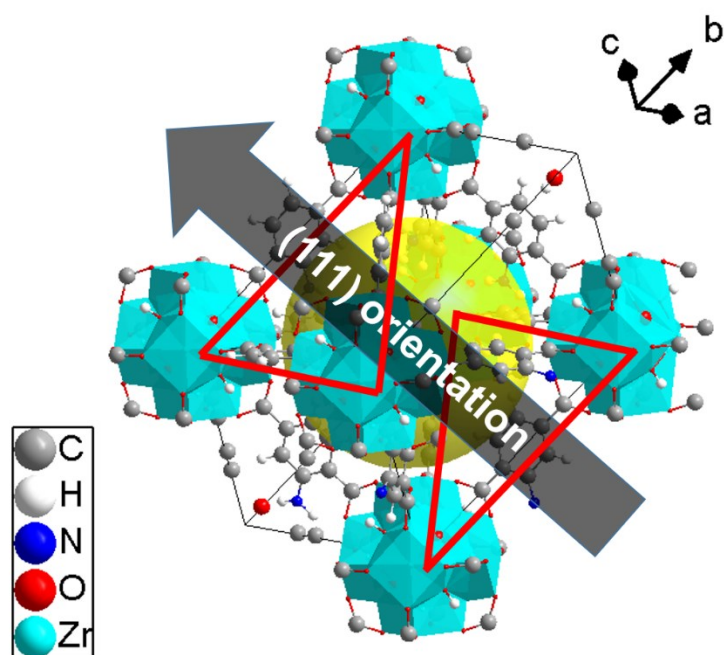

**Fig. S3.** Illustration of the octahedral cage of UiO-66-NH<sub>2</sub> and the indication of (111) orientation.

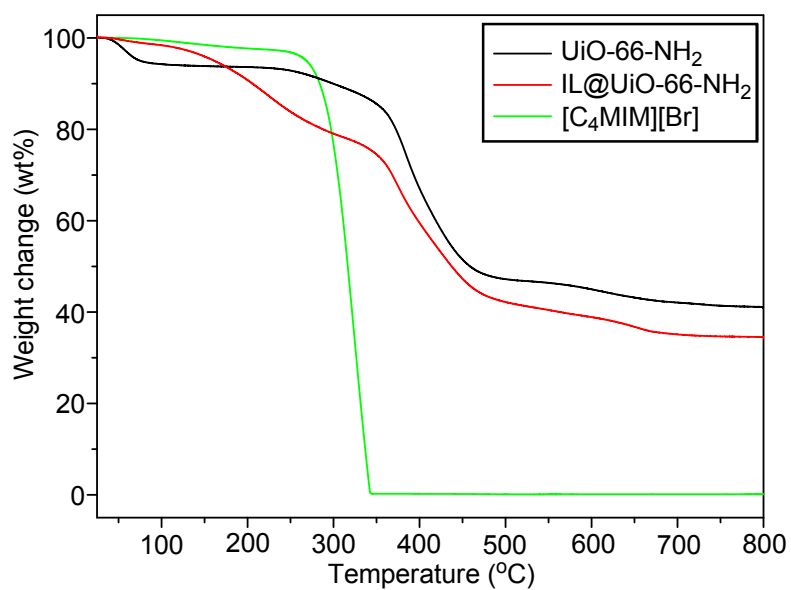

**Fig. S4.** TGA thermograms of a UiO-66-NH<sub>2</sub> membrane and an IL@UiO-66-NH<sub>2</sub> membrane along with a [C<sub>4</sub>MIM][Br] sample under air flow.

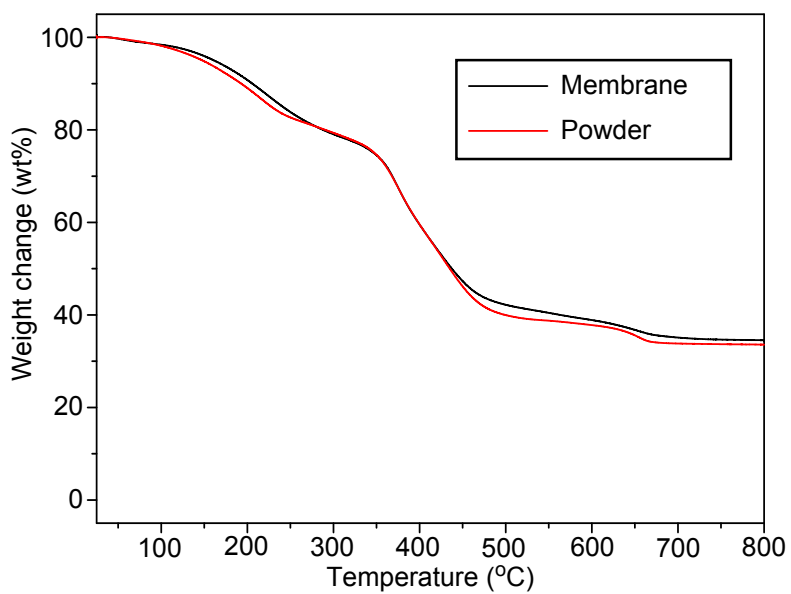

**Fig. S5.** TGA thermograms of IL@UiO-66-NH<sub>2</sub> membrane and powder samples.

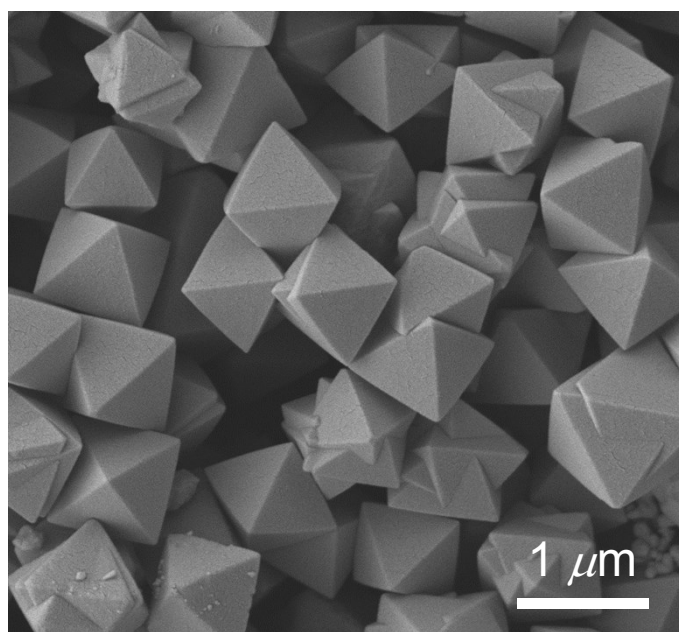

**Fig. S6.** SEM image of UiO-66-NH<sub>2</sub> particles.

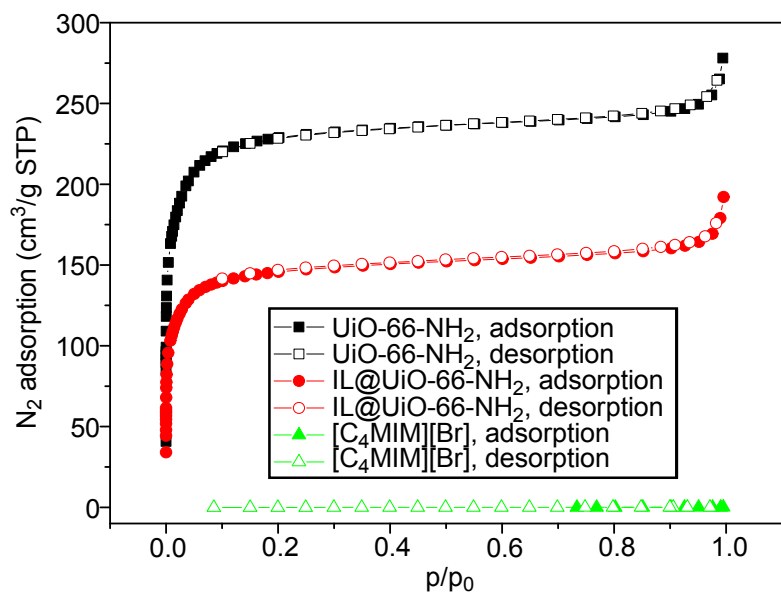

**Fig. S7.** N<sub>2</sub> adsorption/desorption isotherms at 77 K.

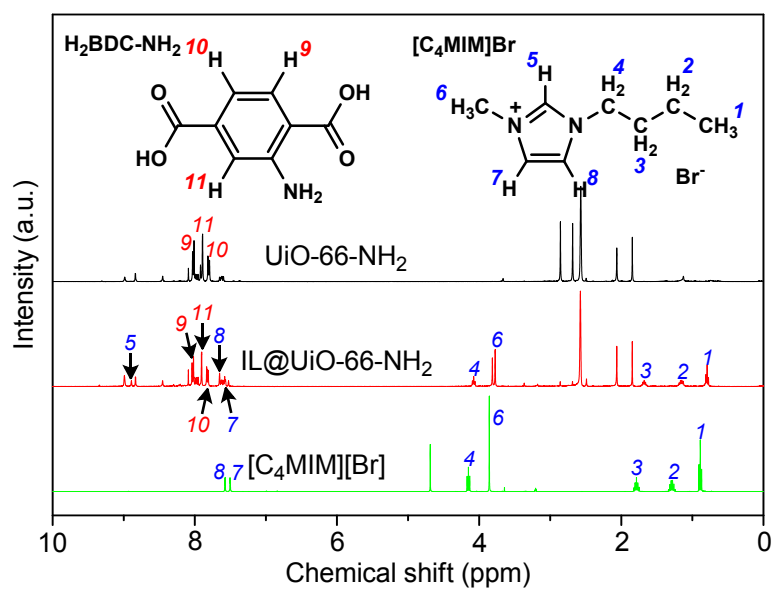

**Fig. S8.** <sup>1</sup>H NMR spectra of samples dissolved in H<sub>2</sub>SO<sub>4</sub> and DMF (1:9, vol) mixture.



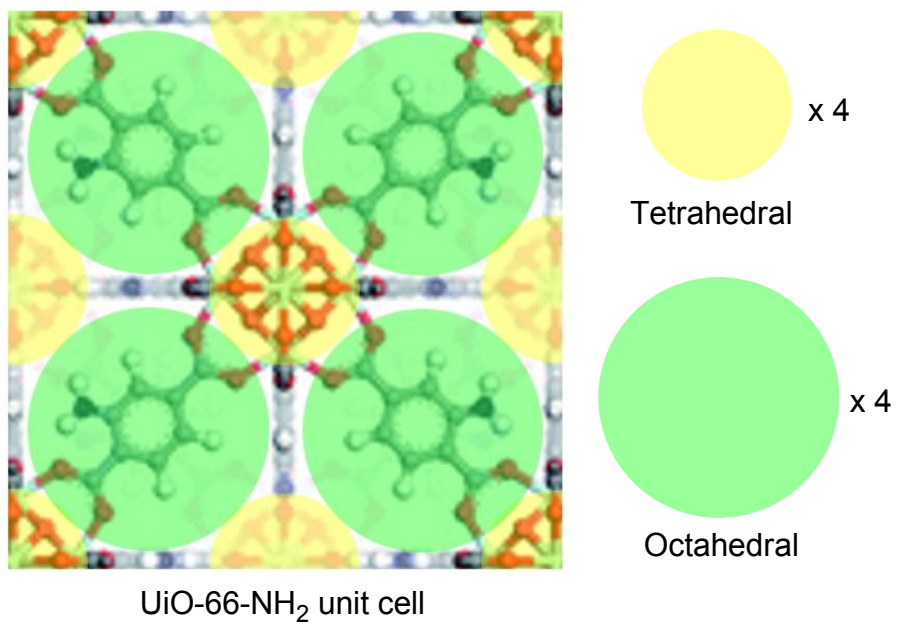

**Fig. S9.** Illustration of cages of UiO-66-NH<sub>2</sub> unit cell.

**Table S1.** Heat of sorption (i.e., sorption enthalpy) of water vapor at 1.1 kPa.

| UiO-66-NH <sub>2</sub>             | IL@UiO-66-NH <sub>2</sub>          | [C <sub>4</sub> MIM][Br]            |
|------------------------------------|------------------------------------|-------------------------------------|
| -51.76 ± 1.42 kJ mol <sup>-1</sup> | -54.13 ± 0.85 kJ mol <sup>-1</sup> | -40.01 ± 11.30 kJ mol <sup>-1</sup> |

**Table S2.** Effective diffusivity ( $D_{eff}$ ) of water vapor at 293 K and  $p/p_0 = 0.5$ .

| UiO-66-NH <sub>2</sub>                                            | IL@UiO-66-NH <sub>2</sub>                                         | [C <sub>4</sub> MIM][Br]                                         |
|-------------------------------------------------------------------|-------------------------------------------------------------------|------------------------------------------------------------------|
| 4.85 ± 0.09 × 10 <sup>-11</sup> cm <sup>2</sup> sec <sup>-1</sup> | 5.98 ± 0.05 × 10 <sup>-11</sup> cm <sup>2</sup> sec <sup>-1</sup> | 1.77 ± 0.63 × 10 <sup>-7</sup> cm <sup>2</sup> sec <sup>-1</sup> |

**Diffusion in spherical particle (unipore model)**

In the case of UiO-66-NH<sub>2</sub> and IL@UiO-66-NH<sub>2</sub>, the fractional uptake of adsorbate diffusing in or out a spherical particle at time  $t$  is given as follows;<sup>1</sup>

$$\frac{M_t}{M_\infty} = 1 - \frac{6}{\pi^2} \sum_{n=1}^{\infty} \frac{1}{n^2} e^{-\frac{D_{eff} n^2 \pi^2 t}{R^2}}. \quad (S1)$$

Where  $M_t$  (mmol) and  $M_\infty$  (mmol) are moles of adsorbed gas phase molecules at time  $t$  and at equilibrium, respectively, and  $D_{eff}$  (cm<sup>2</sup>/s) is the effective diffusivity, and  $R$  (cm) is the radius of particle. In the short time region ( $M_t/M_\infty < 0.5$ ), the kinetic adsorption is essentially linear and Equation S1 can be simplified by<sup>2</sup>

$$\frac{M_t}{M_\infty} \approx \frac{6}{\sqrt{\pi}} \sqrt{\frac{D_{eff}}{R^2}} t. \quad (S2)$$

**Diffusion in plane liquid**

In case of [C<sub>4</sub>MIM][Br], the relative amount of gas uptake diffusing into a plane liquid at time  $t$  is expressed by follows;<sup>1</sup>

$$\frac{M_t}{M_\infty} = 1 - \frac{8}{\pi^2} \sum_{n=1}^{\infty} \frac{1}{(2n+1)^2} e^{-\frac{D_{eff} (2n+1)^2 \pi^2 t}{4L^2}}. \quad (S3)$$

Where  $L$  (cm) is the half thickness of plane. For the short time region ( $M_t/M_\infty < 0.5$ ), Equation S3 is approximated by<sup>3</sup>

$$\frac{M_t}{M_\infty} \approx \frac{2}{\sqrt{\pi}} \sqrt{\frac{D_{eff}}{L^2}} t. \quad (S4)$$

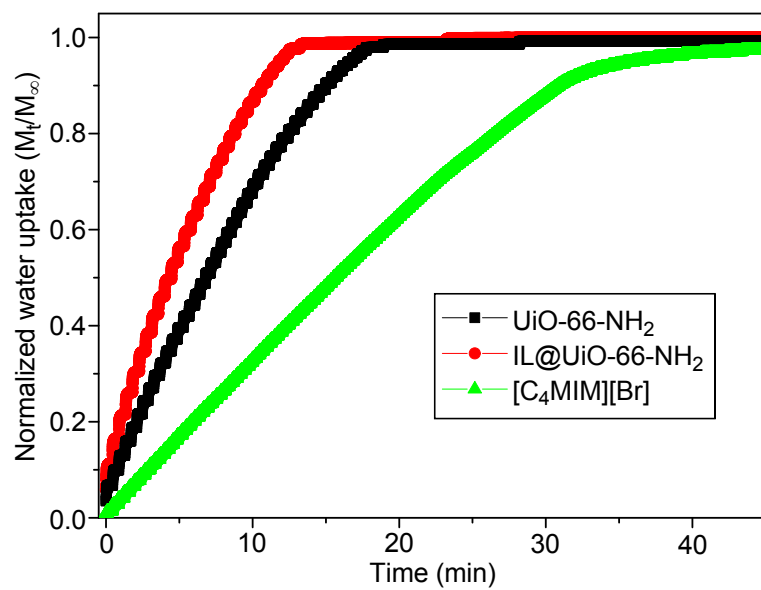

**Fig. S10.** Kinetics of water vapor adsorption at 295 K and 50% RH for overall dosing.

**Table S3.** Comparison of H<sub>2</sub>O/N<sub>2</sub> separation performances.

| Sample                                                                               | Temperature (°C) | Thickness (μm) | H <sub>2</sub> O permeance (mol m <sup>-2</sup> s <sup>-1</sup> Pa <sup>-1</sup> ) | H <sub>2</sub> O permeability (Barrer) | H <sub>2</sub> O/N <sub>2</sub> separation factor | Ref.      |
|--------------------------------------------------------------------------------------|------------------|----------------|------------------------------------------------------------------------------------|----------------------------------------|---------------------------------------------------|-----------|
| PEO-PBT                                                                              | 30               | 30             | 9.57 x 10 <sup>-7</sup>                                                            | 85500                                  | 40500                                             | 4         |
| PAN                                                                                  | 30               | 12.7           | 7.9 x 10 <sup>-9</sup>                                                             | 300                                    | 1875000                                           | 5         |
| PEBAX®1074                                                                           | 30               | 78             | 8.58 x 10 <sup>-7</sup>                                                            | 200000                                 | 104167                                            | 6         |
| SPEEK                                                                                | 30               | 51             | 3.22 x 10 <sup>-6</sup>                                                            | 490000                                 | 350000                                            |           |
| TMSC                                                                                 | 23               | 1.2            | 1.34 x 10 <sup>-6</sup>                                                            | 4808                                   | 11000                                             | 7         |
| PVA/LiC/TiO <sub>2</sub>                                                             | 24               | n/a            | 4.57 x 10 <sup>-7</sup>                                                            | n/a                                    | 450                                               | 8         |
| PVA/TiO <sub>2</sub>                                                                 | 24               | n/a            | 5.11 x 10 <sup>-7</sup>                                                            | n/a                                    | 5781                                              |           |
| PVA/LiCl                                                                             | 24               | 180            | 5.58 x 10 <sup>-7</sup>                                                            | 300000                                 | 2800                                              | 9         |
| Pebax@1657/GO                                                                        | 21               | 5.7            | 1.68 x 10 <sup>-6</sup>                                                            | 28632                                  | 80000                                             | 10        |
| PSf/Si-TFN                                                                           | 30               | 0.4            | 7.37 x 10 <sup>-7</sup>                                                            | 881                                    | 501                                               | 11        |
| PSf/D <sup>1.0</sup> T <sup>0.2</sup> C <sub>2</sub> TiO <sub>2</sub> <sup>0.2</sup> | 30               | 0.226          | 4.49 x 10 <sup>-7</sup>                                                            | 303                                    | 486                                               | 12        |
| ABn-NH-TFN                                                                           | 30               | 0.31           | 9.41 x 10 <sup>-7</sup>                                                            | 872                                    | 913                                               | 13        |
| PBI/TiO <sub>2</sub>                                                                 | 22               | 20             | 1.19 x 10 <sup>-6</sup>                                                            | 71000                                  | 3100000                                           | 14        |
| PA/GT                                                                                | 30               | n/a            | 9.45 x 10 <sup>-7</sup>                                                            | n/a                                    | 910                                               | 15        |
| Zeolite NaA                                                                          | 32               | 2              | 6.8 x 10 <sup>-6</sup>                                                             | 40664                                  | 178                                               | 16        |
| GO                                                                                   | 30.8             | 6              | 1.01 x 10 <sup>-5</sup>                                                            | 182000                                 | 10000                                             | 17        |
| GLX-cross-linked GO                                                                  |                  | 1.64           | 1.68 x 10 <sup>-5</sup>                                                            | 82380                                  | 2800000                                           | 18        |
| [C <sub>2</sub> MIM][Tf <sub>2</sub> N]                                              | 31               | 132            | 2.1 x 10 <sup>-7</sup>                                                             | 82883                                  | 3843                                              | 19        |
| [C <sub>2</sub> MIM][BF <sub>4</sub> ]                                               | 31               | 132            | 3.5 x 10 <sup>-7</sup>                                                             | 138138                                 | 16300                                             |           |
| [N <sub>4111</sub> ][Tf <sub>2</sub> N]                                              | 31               | 132            | 1.9 x 10 <sup>-7</sup>                                                             | 74989                                  | 3290                                              |           |
| TEG                                                                                  | 30               | 47             | 5.7 x 10 <sup>-8</sup>                                                             | 8010                                   | 2500                                              | 20        |
| PEG-400                                                                              | 22               | 67             | 5 x 10 <sup>-8</sup>                                                               | 10017                                  | 2000                                              |           |
| [C <sub>2</sub> MIM][DCA]                                                            | 25               | 11.5           | 1.6 x 10 <sup>-6</sup>                                                             | 55016                                  | > 1000                                            | 21        |
| [C <sub>2</sub> MIM][ESU]                                                            | 25               | 10.3           | 1.5 x 10 <sup>-6</sup>                                                             | 46196                                  | > 1000                                            |           |
| [C <sub>2</sub> MIM][BF <sub>4</sub> ]                                               | 25               | 9.9            | 1.2 x 10 <sup>-6</sup>                                                             | 35521                                  | > 1000                                            |           |
| TEG                                                                                  | 25               | 12.8           | 7.2 x 10 <sup>-7</sup>                                                             | 27556                                  | > 1000                                            |           |
| UiO-66-NH <sub>2</sub>                                                               | 22               | ~ 2            | 6.10 ± 1.52 x 10 <sup>-5</sup>                                                     | 440000 ± 120000                        | 312 ± 68                                          | This work |
| IL@UiO-66-NH <sub>2</sub>                                                            | 22               | ~ 2            | 2.36 ± 0.59 x 10 <sup>-4</sup>                                                     | 1580000 ± 110000                       | 1564 ± 218                                        |           |
| [C <sub>4</sub> MIM][Br]                                                             | 22               | ~ 58           | 1.57 ± 0.50 x 10 <sup>-6</sup>                                                     | 270000 ± 90000                         | 4206 ± 1182                                       |           |

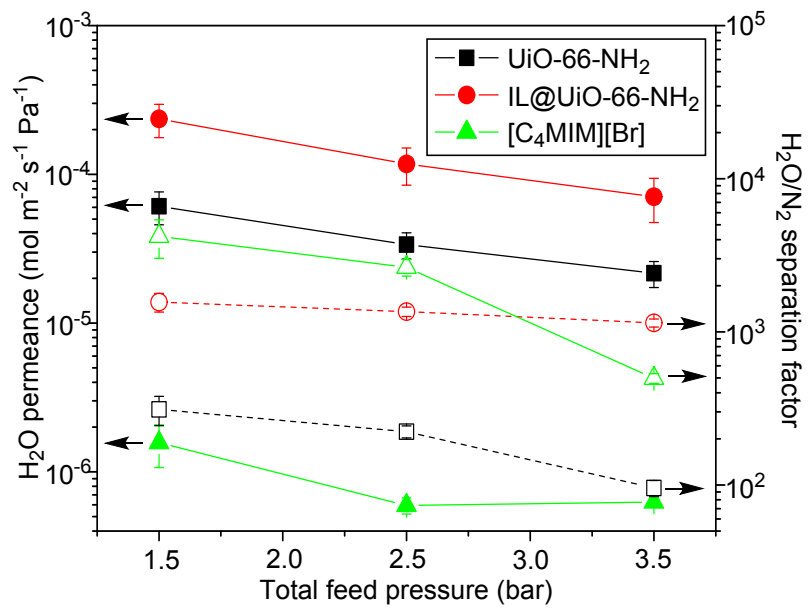

**Fig. S11.** H<sub>2</sub>O/N<sub>2</sub> separation performances of samples under various feed pressure at 22 °C.

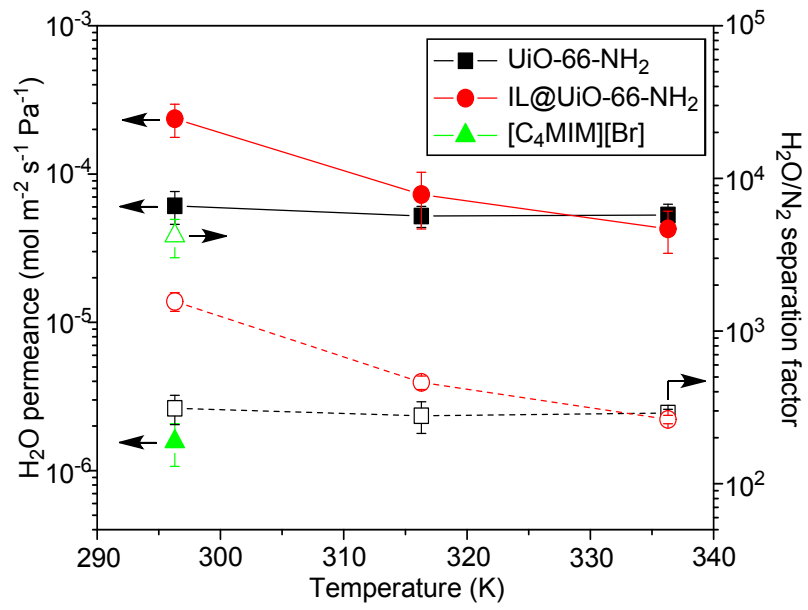

**Fig. S12.** H<sub>2</sub>O/N<sub>2</sub> separation performances of samples under various temperatures at 1.5 bar of feed pressure.

## References

1. Crank, J., *The mathematics of diffusion*. Oxford university press: 1979.
2. Aristov, Y. I.; Glaznev, I. S.; Freni, A.; Restuccia, G., Kinetics of water sorption on a CaCl<sub>2</sub>-in-silica-gel-pores sorbent: The effects of the pellet size and temperature. *Kinet Catal+* **2006**, *47* (5), 770-775.
3. Vergnaud, J.-M., *Controlled drug release of oral dosage forms*. CRC Press: 1993.
4. Metz, S. J.; van de Ven, W. J. C.; Potreck, J.; Mulder, M. H. V.; Wessling, M., Transport of water vapor and inert gas mixtures through highly selective and highly permeable polymer membranes. *J Membr Sci* **2005**, *251* (1-2), 29-41.
5. Allen, S. M.; Fujii, M.; Stannett, V.; Hopfenberg, H. B.; Williams, J. L., The barrier properties of polyacrylonitrile. *J Membr Sci* **1977**, *2*, 153-163.
6. Sijbesma, H.; Nymeijer, K.; van Marwijk, R.; Heijboer, R.; Potreck, J.; Wessling, M., Flue gas dehydration using polymer membranes. *J Membr Sci* **2008**, *313* (1-2), 263-276.
7. Puspasari, T.; Akhtar, F. H.; Ogieglo, W.; Alharbi, O.; Peinemann, K. V., High dehumidification performance of amorphous cellulose composite membranes prepared from trimethylsilyl cellulose. *J Mater Chem A* **2018**, *6* (19), 9271-9279.
8. Bui, T. D.; Chen, F.; Nida, A.; Chua, K. J.; Ng, K. C., Experimental and modeling analysis of membrane-based air dehumidification. *Sep Purif Technol* **2015**, *144*, 114-122.
9. Bui, D. T.; Nida, A.; Ng, K. C.; Chua, K. J., Water vapor permeation and dehumidification performance of poly (vinyl alcohol)/lithium chloride composite membranes. *J Membr Sci* **2016**, *498*, 254-262.
10. Akhtar, F. H.; Kumar, M.; Peinemann, K.-V., Pebax®1657/Graphene oxide composite membranes for improved water vapor separation. *J Membr Sci* **2017**, *525*, 187-194.
11. Baig, M. I.; Ingole, P. G.; Choi, W. K.; Jeon, J. D.; Jang, B.; Moon, J. H.; Lee, H. K., Synthesis and characterization of thin film nanocomposite membranes incorporated with surface functionalized Silicon nanoparticles for improved water vapor permeation performance. *Chem Eng J* **2017**, *308*, 27-39.
12. Baig, M. I.; Ingole, P. G.; Choi, W. K.; Park, S. R.; Kang, E. C.; Lee, H. K., Development of carboxylated TiO<sub>2</sub> incorporated thin film nanocomposite hollow fiber membranes for flue gas dehydration. *J Membr Sci* **2016**, *514*, 622-635.
13. Ingole, P. G.; Pawar, R. R.; Baig, M. I.; Jeon, J. D.; Lee, H. K., Thin film nanocomposite (TFN) hollow fiber membranes incorporated with functionalized acid-activated bentonite (ABn-NH) clay: towards enhancement of water vapor permeance and selectivity. *J Mater Chem A* **2017**, *5* (39), 20947-20958.
14. Akhtar, F. H.; Kumar, M.; Villalobos, L. F.; Vovusha, H.; Shevate, R.; Schwingenschlogl, U.; Peinemann, K. V., Polybenzimidazole-based mixed membranes with exceptionally high water vapor permeability and selectivity. *J Mater Chem A* **2017**, *5* (41), 21807-21819.
15. Baig, M. I.; Ingole, P. G.; Jeon, J.-d.; Hong, S. U.; Choi, W. K.; Lee, H. K., Water vapor transport properties of interfacially polymerized thin film nanocomposite membranes modified with

graphene oxide and GO-TiO<sub>2</sub> nanofillers. *Chem Eng J* **2019**, *373*, 1190-1202.

16. Xing, R.; Rao, Y. X.; TeGrotenhuis, W.; Canfield, N.; Zheng, F.; Winiarski, D. W.; Liu, W., Advanced thin zeolite/metal flat sheet membrane for energy efficient air dehumidification and conditioning. *Chem Eng Sci* **2013**, *104*, 596-609.

17. Shin, Y.; Liu, W.; Schwenger, B.; Manandhar, S.; Chase-Woods, D.; Engelhard, M. H.; Devanathan, R.; Fifield, L. S.; Bennett, W. D.; Ginovska, B.; Gotthold, D. W., Graphene oxide membranes with high permeability and selectivity for dehumidification of air. *Carbon* **2016**, *106*, 164-170.

18. Hung, W. S.; Lai, Y. L.; Lee, P. H.; Chiao, Y. H.; Sengupta, A.; Sivakumar, M.; Lee, K. R.; Lai, J. Y., Tuneable interlayer spacing self-assembling on graphene oxide-framework membrane for enhance air dehumidification. *Sep Purif Technol* **2020**, *239*, 116499-116506.

19. Scovazzo, P., Testing and evaluation of room temperature ionic liquid (RTIL) membranes for gas dehumidification. *J Membr Sci* **2010**, *355* (1-2), 7-17.

20. Ito, A., Dehumidification of air by a hygroscopic liquid membrane supported on surface of a hydrophobic microporous membrane. *J Membr Sci* **2000**, *175* (1), 35-42.

21. Kudasheva, A.; Kamiya, T.; Hirota, Y.; Ito, A., Dehumidification of air using liquid membranes with ionic liquids. *J Membr Sci* **2016**, *499*, 379-385.
